# Supplementary material for: BO-CNN-BiLSTM deep learning model integrating multisource remote sensing data for improving winter wheat yield estimation
Source: PubMed Central journal article supplement (PMC11695193; doi:10.3389/fpls.2024.1500499), 2024-12-20
Supplement: DataSheet1.pdf [file DataSheet1.pdf]

## Appendix: Model Hyperparameter Optimization and Ranges

In this study, we performed hyperparameter optimization for several models. Below is a detailed description of each model and its corresponding hyperparameter optimization ranges.

### 1. CNN-BiLSTM Model Hyperparameter Ranges

The CNN-BiLSTM model combines the strengths of Convolutional Neural Networks (CNN) and Bidirectional Long Short-Term Memory (BiLSTM) networks, making it well-suited for handling sequential data. The hyperparameter optimization ranges are as follows:

**filters:** Number of filters in the convolutional layer, range (32, 128)

**kernel\_size:** Size of the convolution kernel, range (2, 5)

**pool\_size:** Pooling layer size, range (2, 5)

**lstm\_units:** Number of units in the LSTM layer, range (64, 256)

**dense\_units\_1:** Number of units in the first dense layer, range (16, 64)

**dense\_units\_2:** Number of units in the second dense layer, range (8, 32)

**learning\_rate:** Learning rate, range (0.0001, 0.01)

### 2. LSTM Model Hyperparameter Ranges

The LSTM model is used for time-series data processing. Its hyperparameter optimization ranges are as follows:

**lstm\_units:** Number of units in the LSTM layer, range (32, 256)

**dense\_units\_1:** Number of units in the first dense layer, range (16, 64)

**dense\_units\_2:** Number of units in the second dense layer, range (8, 32)

**learning\_rate:** Learning rate, range (0.0001, 0.01)

### 3. Transformer Model Hyperparameter Ranges

The Transformer model is a powerful sequence-to-sequence architecture widely used in natural language processing (NLP) tasks and other sequential data tasks. Its hyperparameter optimization ranges are as follows:

**num\_heads:** Number of heads in the self-attention mechanism, range (1, 8)

**num\_layers:** Number of encoder (or decoder) layers in the Transformer, range (1, 4)

**hidden\_space:** Dimension of hidden units in each layer, range (32, 256)

**dropout\_rate:** Dropout rate during training to prevent overfitting, range (0.1, 0.5)

**learning\_rate:** Learning rate, range (0.0001, 0.01)

#### **4. XGBoost Model Hyperparameter Ranges**

XGBoost is a machine learning algorithm based on gradient-boosted trees, commonly applied to classification and regression tasks. Its hyperparameter optimization ranges are as follows:

**max\_depth:** Maximum depth of the trees, range (2, 10)

**learning\_rate:** Learning rate, range (0.001, 0.1)

**max\_leaves:** Maximum number of leaves per tree, range (2, 150)

**n\_estimators:** Number of weak classifiers, range (10, 1000)

#### **5. Random Forest (RF) Model Hyperparameter Ranges**

Random Forest is an ensemble learning method that makes predictions by constructing multiple decision trees. Its hyperparameter optimization ranges are as follows:

**n\_estimators:** Number of decision trees, range (10, 1000)

**max\_depth:** Maximum depth of the trees, range (3, 20)

**max\_features:** Maximum number of features considered for splitting, range (1, 10)

**min\_samples\_split:** Minimum number of samples required to split an internal node, range (1, 10)

**min\_samples\_leaf:** Minimum number of samples required at a leaf node, range (1, 10)
